# Supplementary material for: Exploration of the atmospheric chemistry of nitrous acid in a coastal city of southeastern China: Results from measurements across four seasons
Source: Copernicus journal article supplement (doi:10.5194/acp-2020-880), 2020-09-10
Supplement: Supplementary file 1 [file acp-2020-880-supplement.pdf]

## Supplementary Material

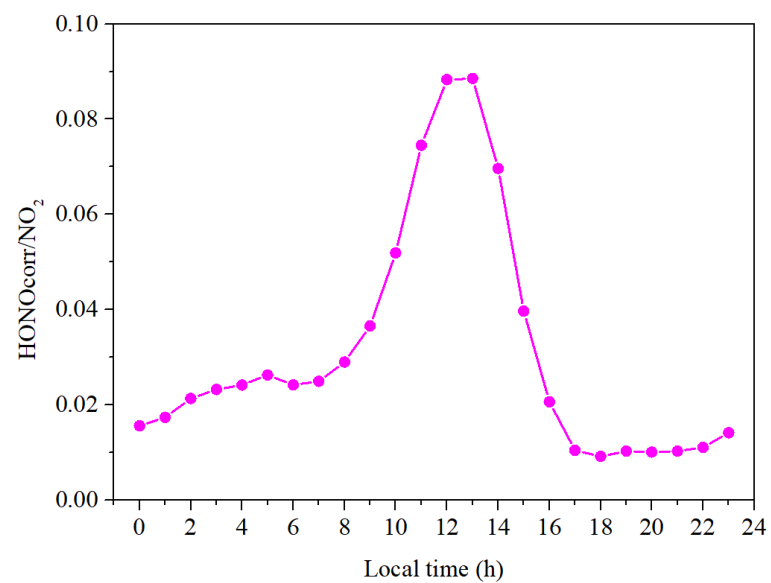

**Figure S1: Diurnal variations of  $\text{HONO}_{\text{corr}}/\text{NO}_2$ .**

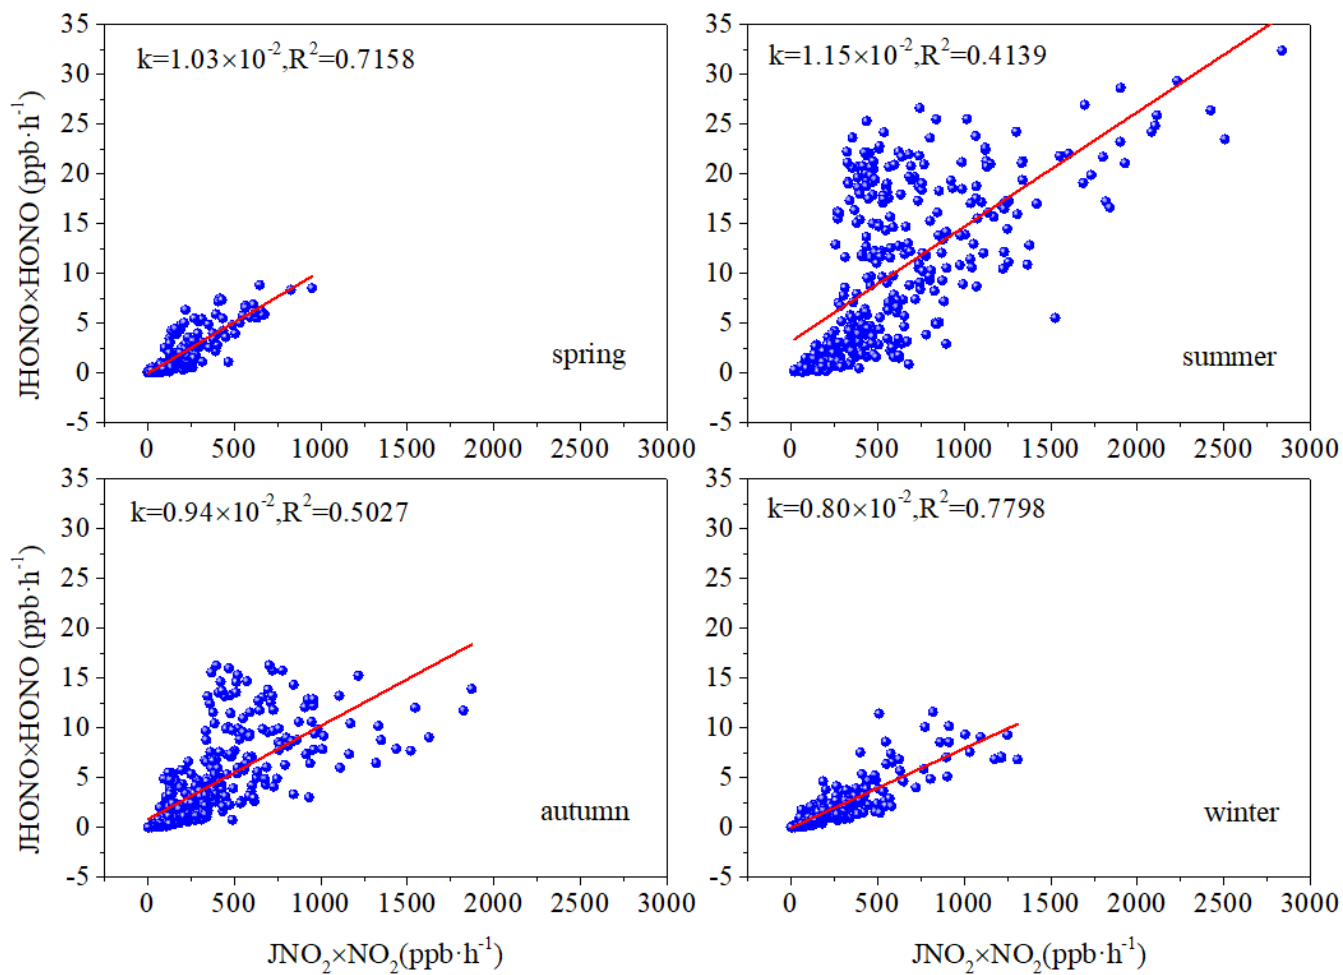

5 **Figure S2: Correlations between  $J(\text{HONO}) \times \text{HONO}$  and  $J(\text{NO}_2) \times \text{NO}_2$ .**

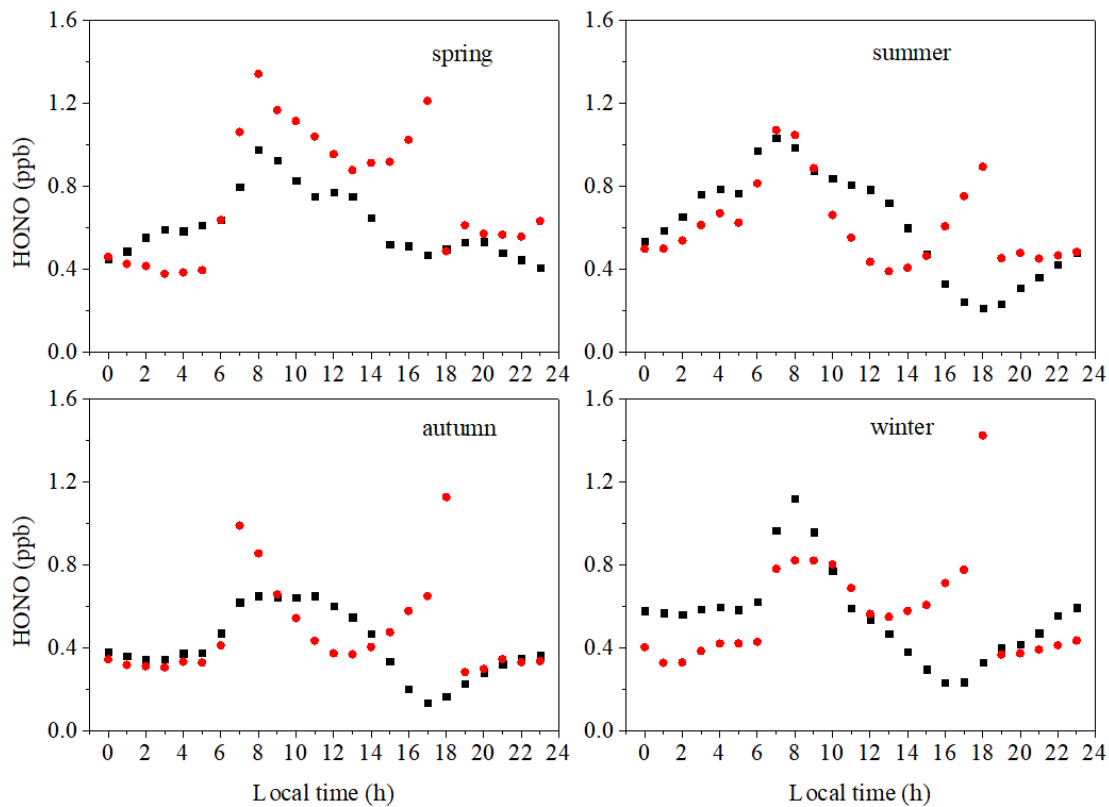

Figure S3: Diurnal profile of the measured values of HONO and the value estimated using the parameterized formula.

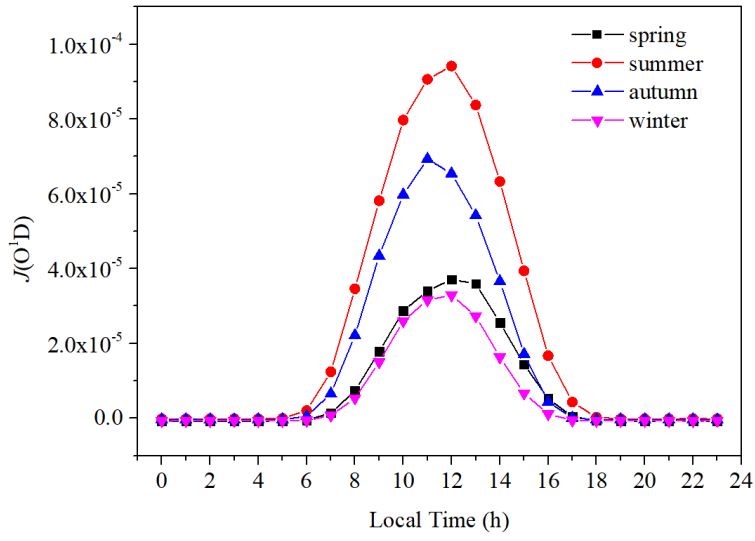

10 **Figure S4: Diurnal variations of  $J(O^1D)$ .**

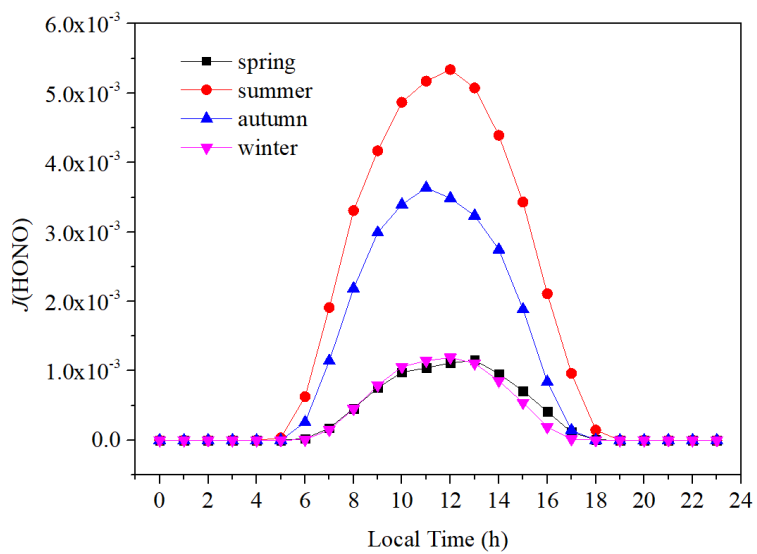

**Figure S5: Diurnal variations of  $J(\text{HONO})$ .**
